# Supplementary material for: Enhancing lifespan of budding yeast by pharmacological lowering of amino acid pools
Source: publisher site journal article supplement (doi:10.18632/aging.202849), 2021-03-21
Supplement: Supplementary file [file aging-v13i6-202849-supplementary-material-SD2.pdf]

## SUPPLEMENTARY TABLE

**Supplementary Table 1. Free amino acids pools.**

| <b>Amino acid</b> | <b>No Myr<br/>(nmoles/1 x 10<sup>7</sup> cells)</b> | <b>Plus Myr</b> | <b>p value</b> | <b>fold change</b> |
|-------------------|-----------------------------------------------------|-----------------|----------------|--------------------|
| Ala               | 23.6                                                | 19.6            | 0.000299       | 0.83               |
| Arg               | 51.1                                                | 27.8            | 2.03E-08       | 0.54               |
| Asp               | 42.0                                                | 24.8            | 1.1E-07        | 0.59               |
| Cys               | 2.6                                                 | 1.5             | 0.109139       | 0.59               |
| Glu               | 197.1                                               | 96.9            | 0.000108       | 0.49               |
| Gly               | 22.4                                                | 11.7            | 3.03E-07       | 0.52               |
| His               | 17.4                                                | 9.3             | 2.8E-08        | 0.53               |
| Ile               | 5.6                                                 | 3.2             | 3.18E-07       | 0.58               |
| Leu               | 15.1                                                | 5.6             | 6.84E-09       | 0.37               |
| Lys               | 64.0                                                | 20.7            | 4.41E-10       | 0.32               |
| Met               | 7.2                                                 | 0.8             | 2.07E-10       | 0.12               |
| Phe               | 3.3                                                 | 2.3             | 5.66E-05       | 0.70               |
| Pro               | 7.1                                                 | 5.0             | 0.00016        | 0.70               |
| Ser               | 10.3                                                | 12.0            | 0.000552       | 1.16               |
| Thr               | 21.9                                                | 22.5            | 0.189192       | 1.03               |
| try               | 2.8                                                 | 2.0             | 0.01478        | 0.71               |
| val               | 36.8                                                | 9.5             | 3.75E-08       | 0.26               |

Free amino acid pools were measured in auxotrophic DBY747 cells (require Ura, Leu, Trp and His) grown in SDC medium buffered with succinate (Liu J, Huang X, Withers BR, Blalock E, Liu K, Dickson RC. Reducing Sphingolipid Synthesis Orchestrates Global Changes to Extend Yeast Lifespan. *Aging Cell*. 2013;12:833-41). Cells were grown from 0.005 to 2 A600nm units/ml at 30° C without and with 0.75 μmol/L (300 ng/ml) of myriocin. Amino acids were extracted by using the heat extraction procedure described in Materials and Methods and quantified by using a Hitachi L-8800A amino acid analyzer. The values for Asp are a combination of Asp and Asn, and for Glu they are combination of Glu and Gln. This occurs because the procedure for preparing samples for injection into the amino analyzer cause deamination of Asn and Gln. Both of these amino acids have small intracellular pools compared to Asp and Glu (see Figure 2). AUC Auxo-No Myr vs Auxo-Plus Myr (95% CI 14.89 to 15.97 vs 20.46 to 21.90). AUC Proto-No Myr vs Proto-Plus Myr (95% CI 25.54 - 26.66 vs 27.82 - 33.65).
